# Supplementary material
Source: bioRxiv or medRxiv preprint supplement (https://medrxiv.org/highwire/filestream/97422/field_highwire_adjunct_files/1/2020.09.16.20195701-2.pdf)

Figure S1

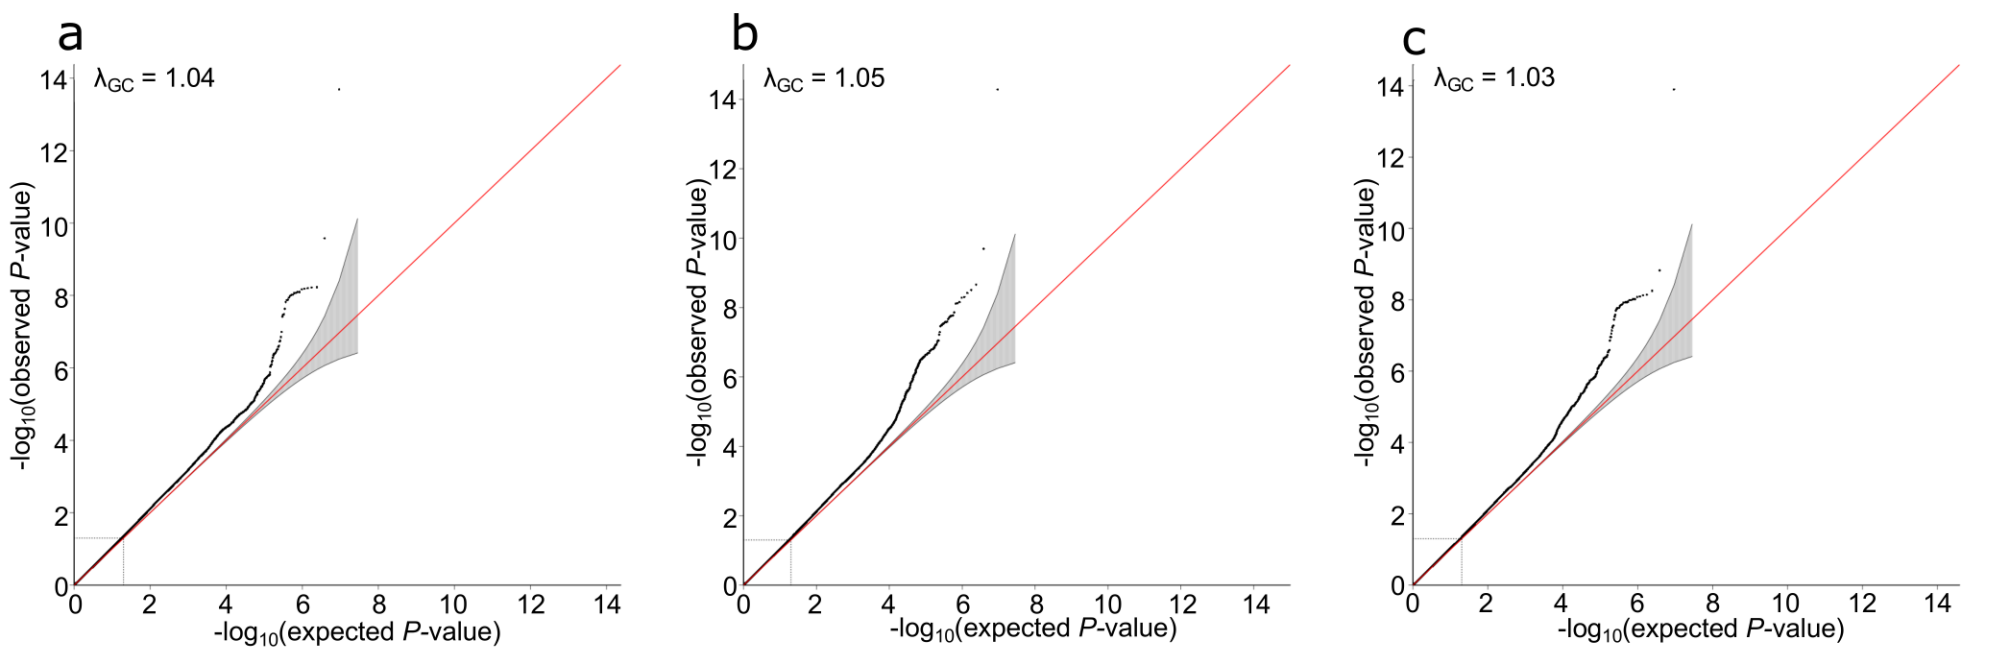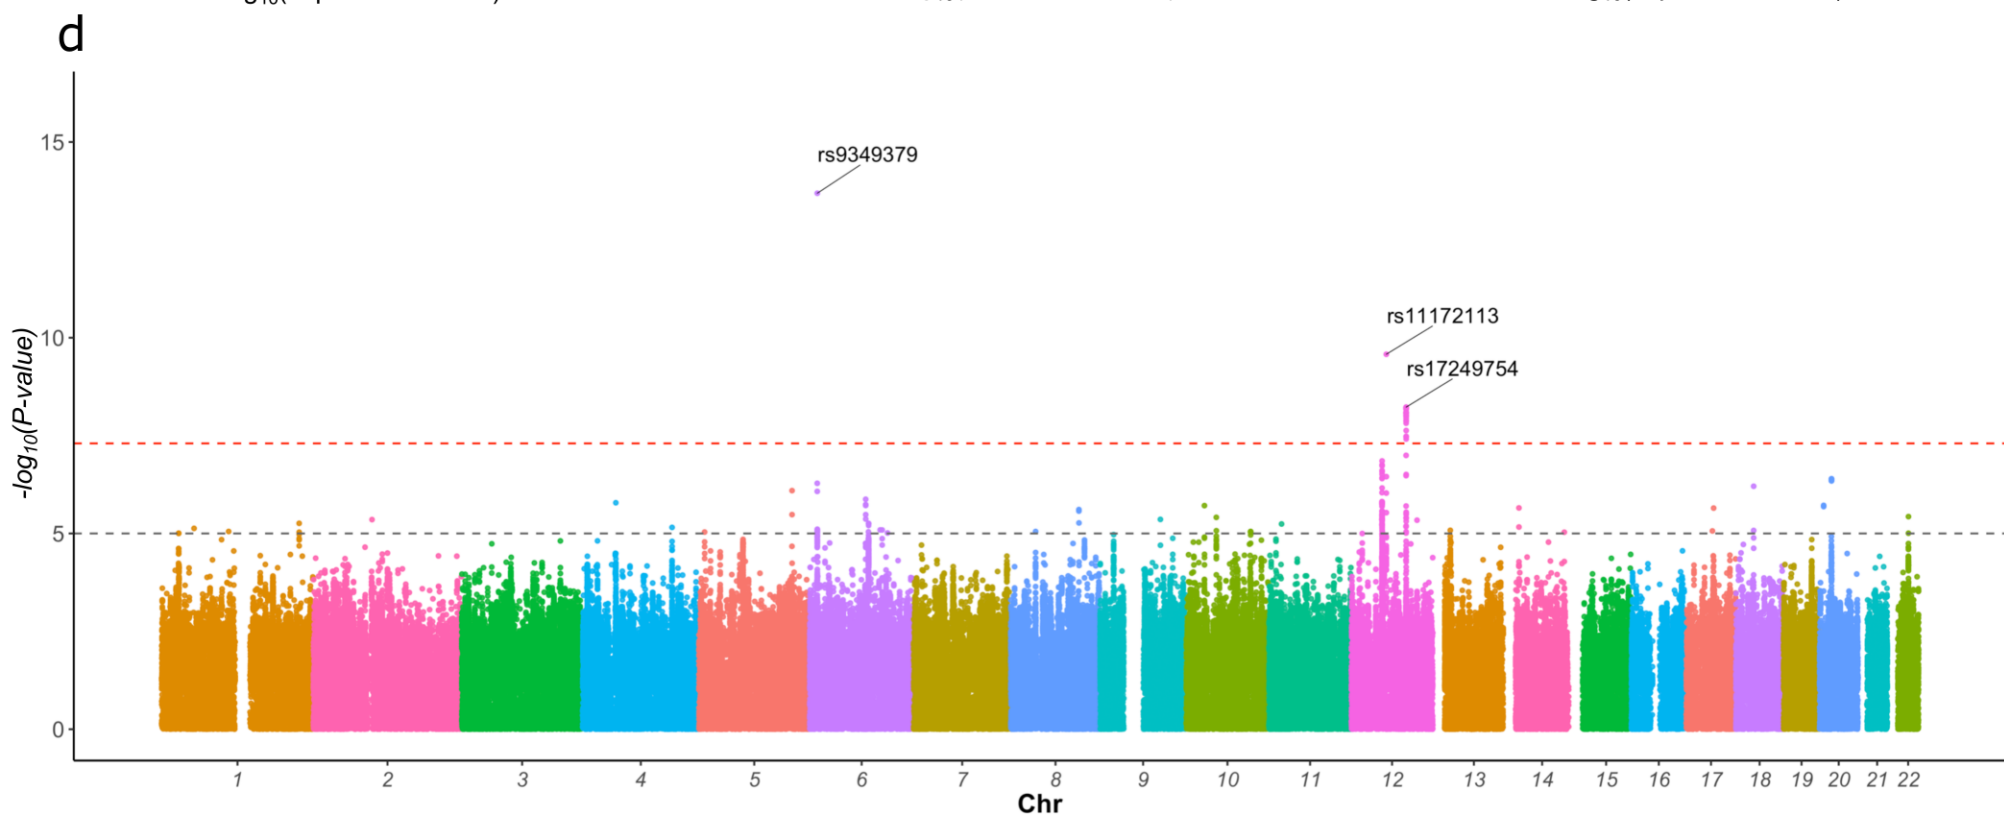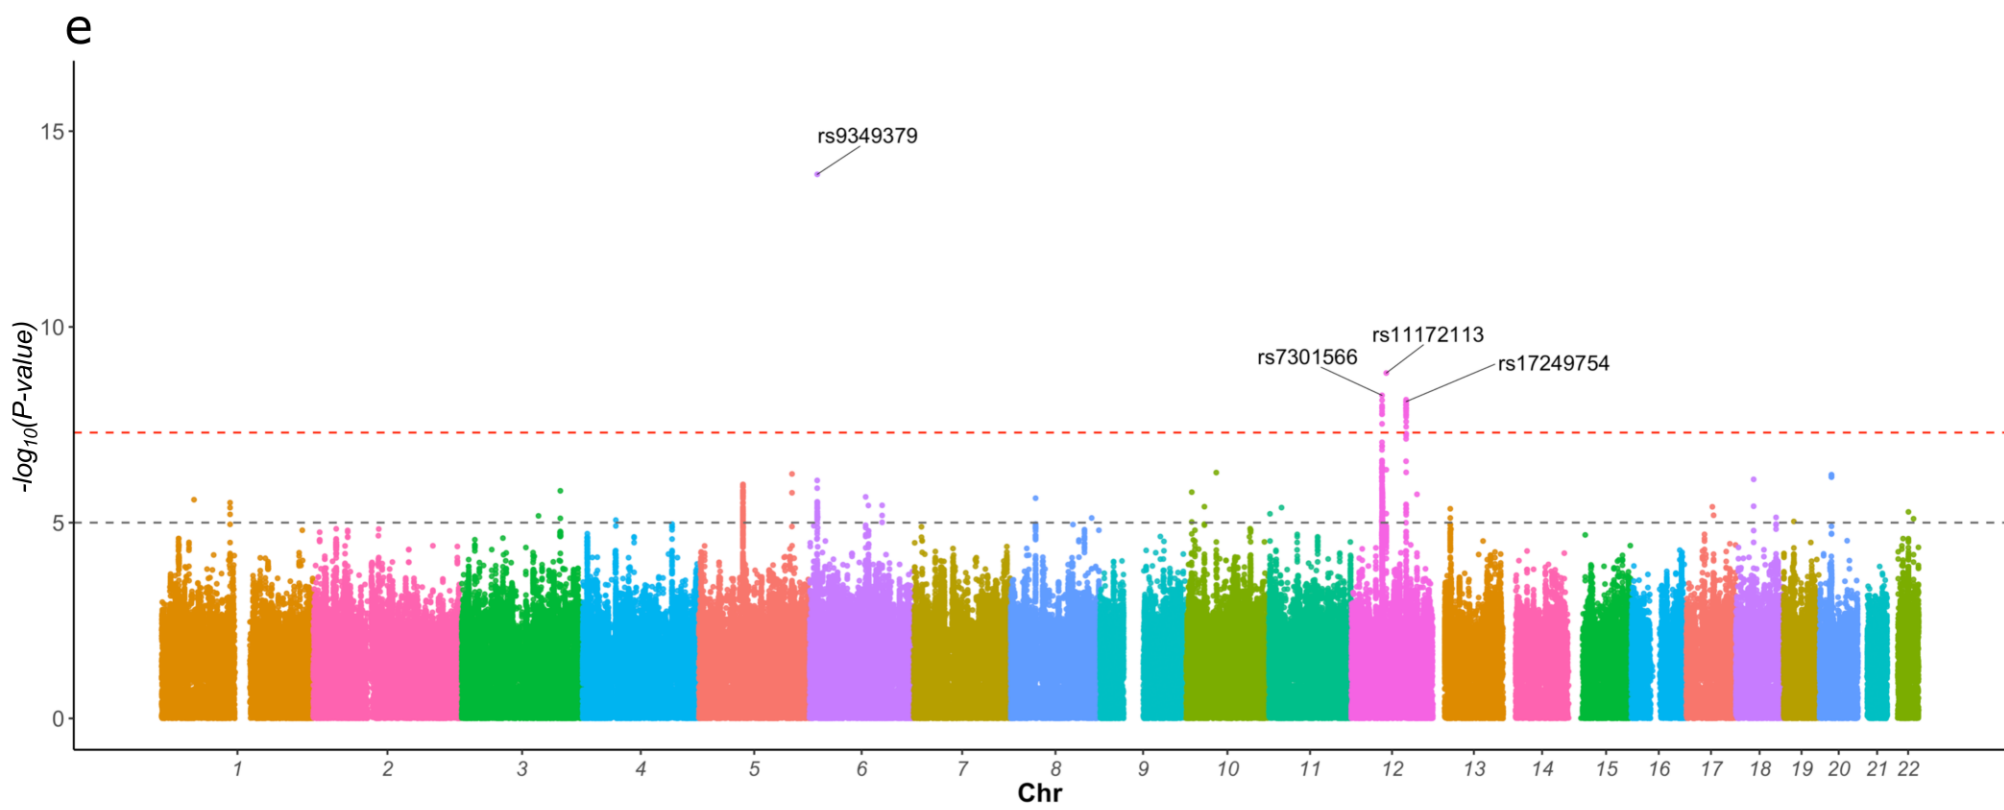

# Figure S2

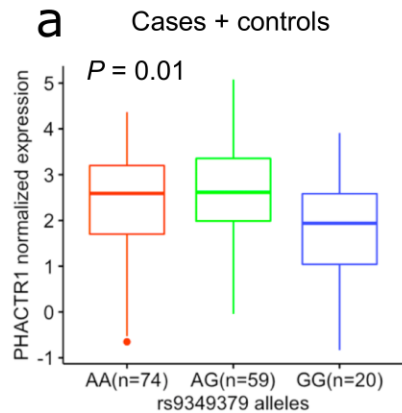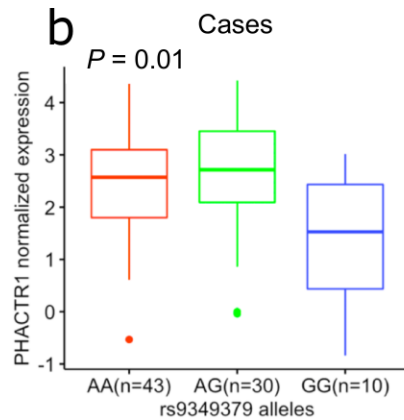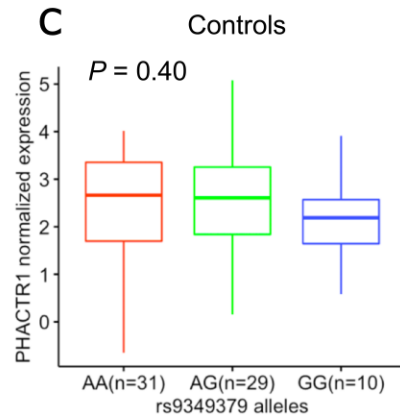

Figure S3

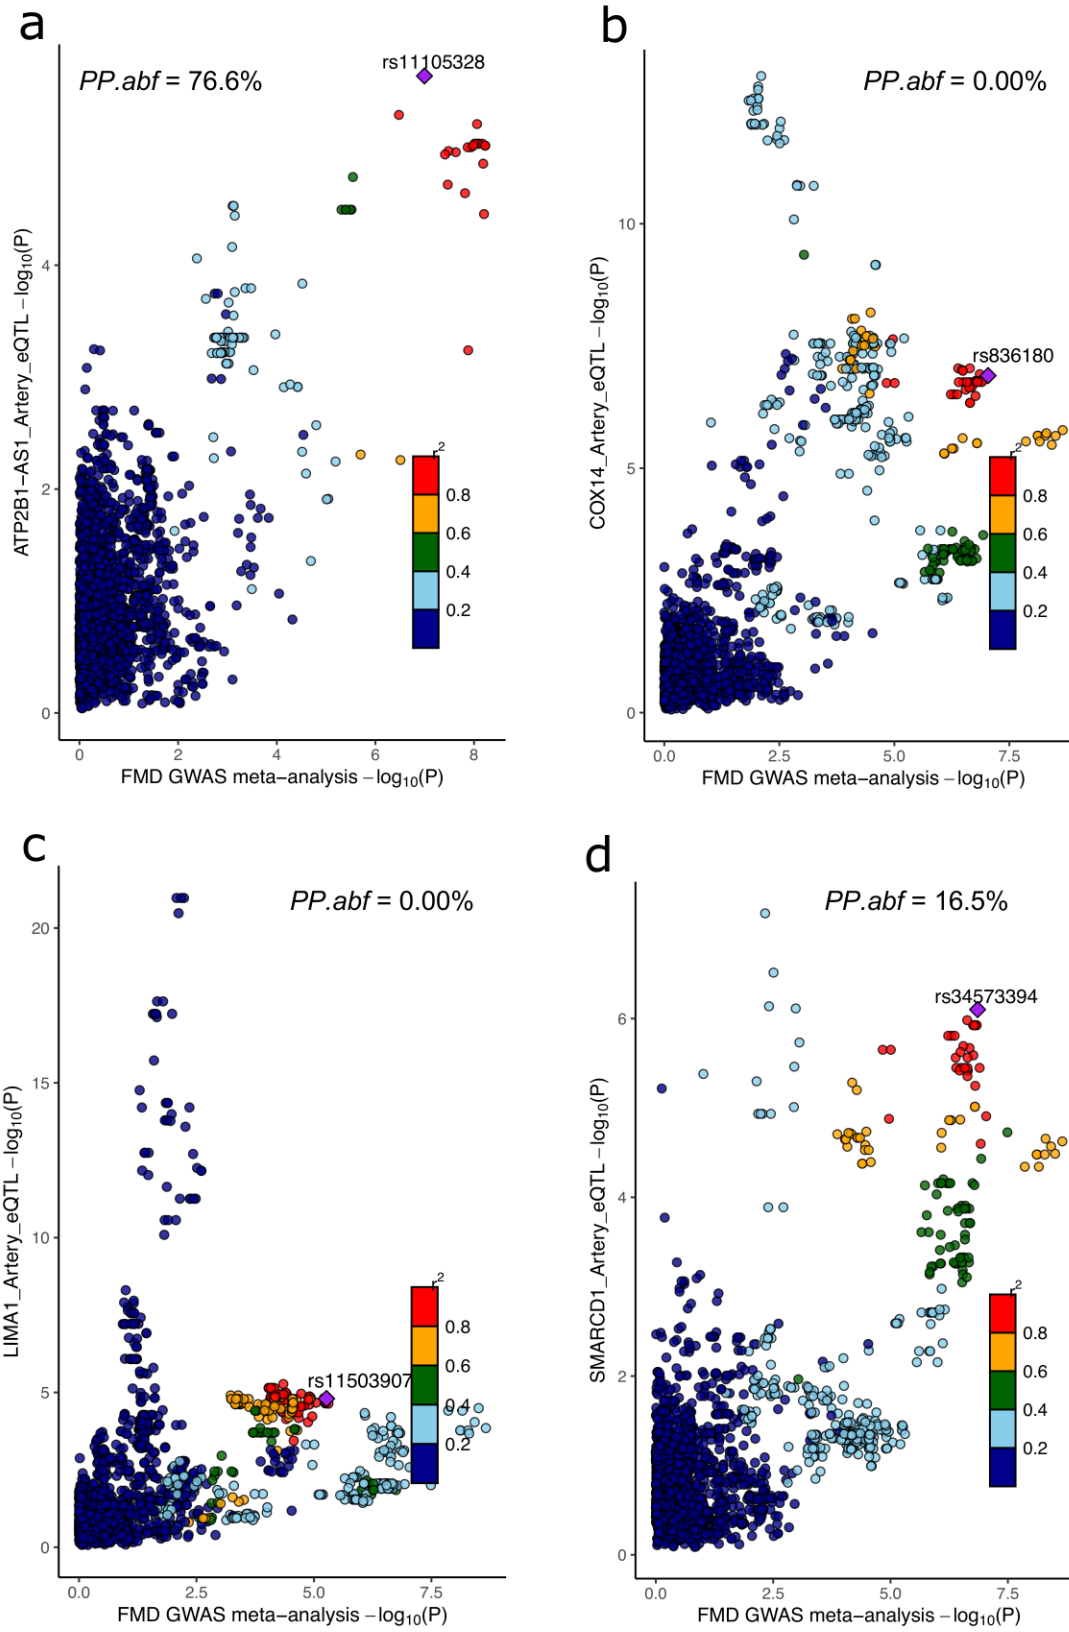

Figure S4

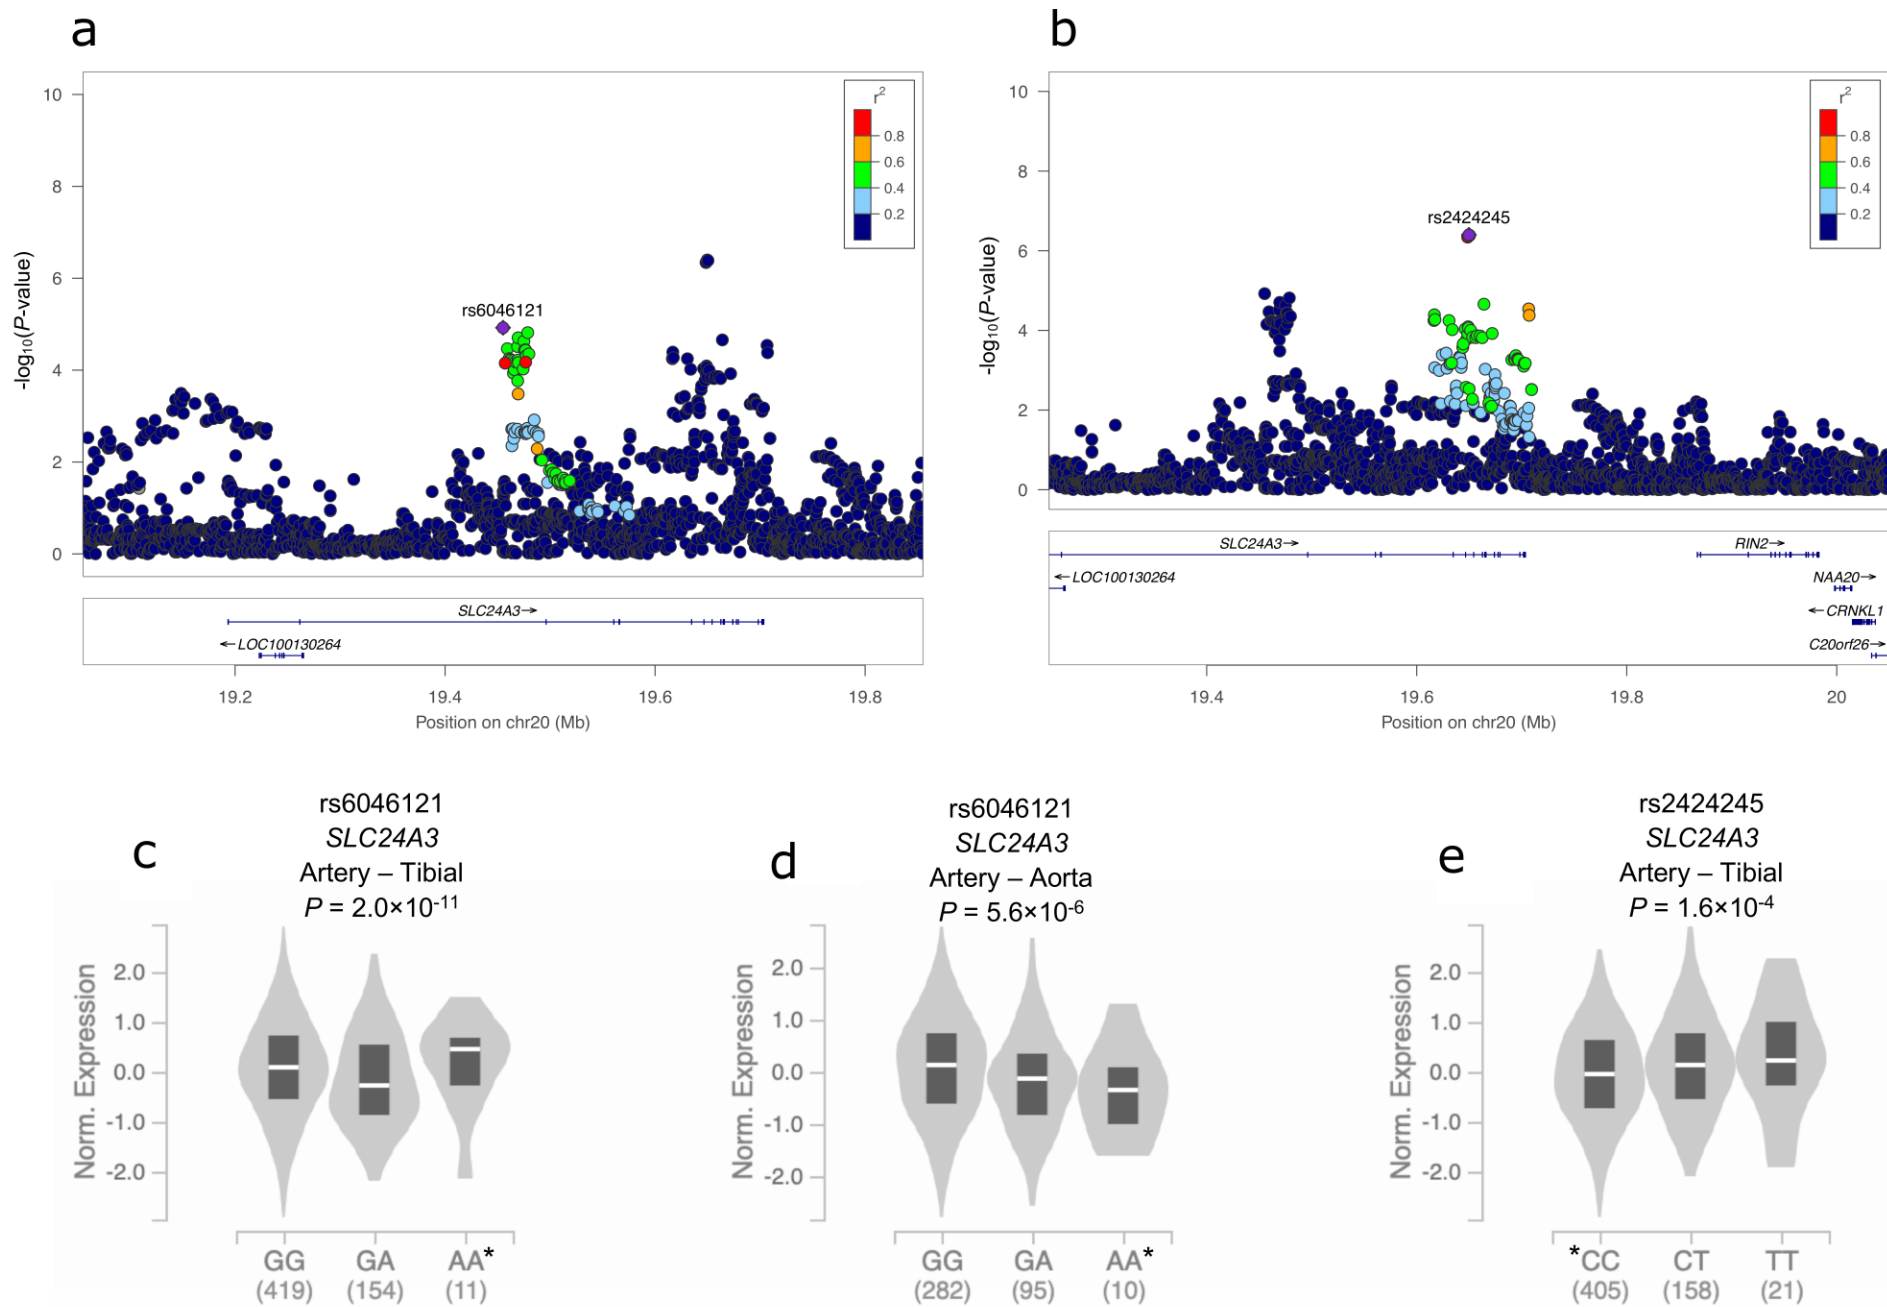

Figure S5

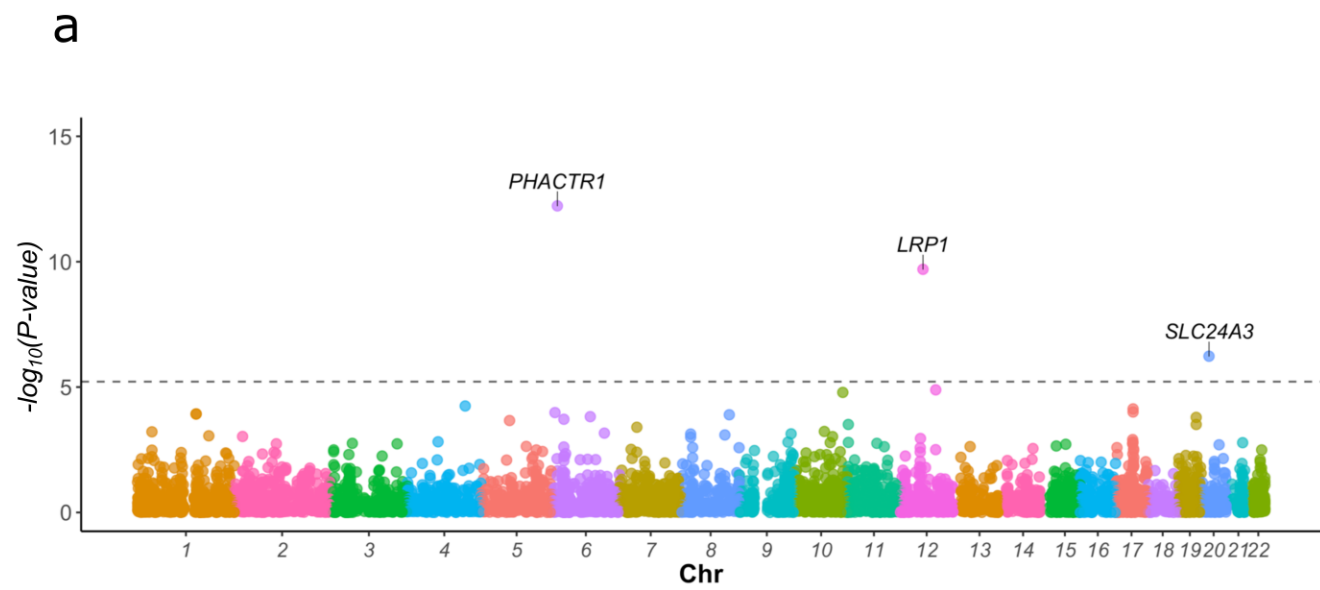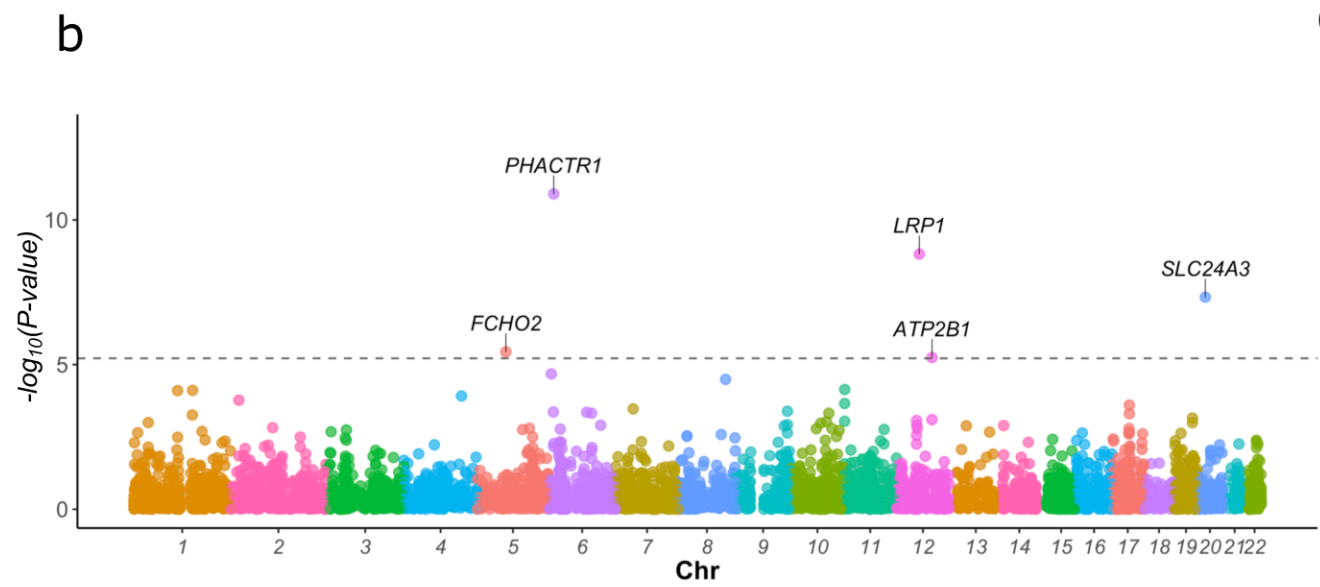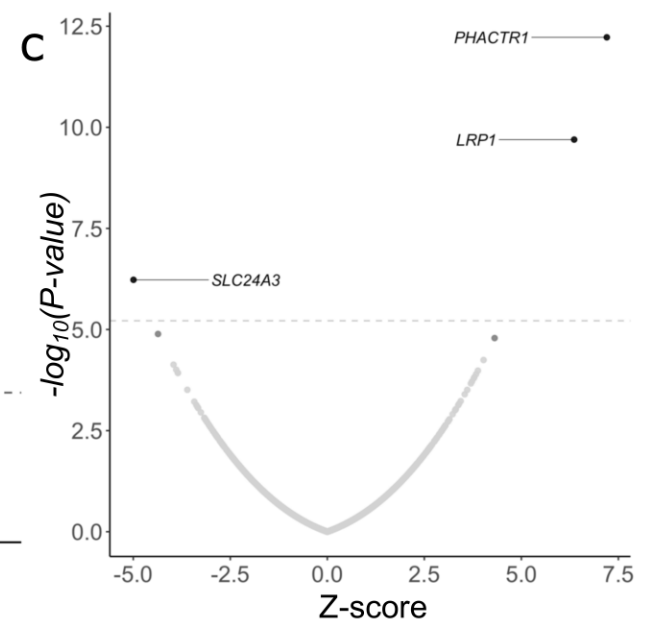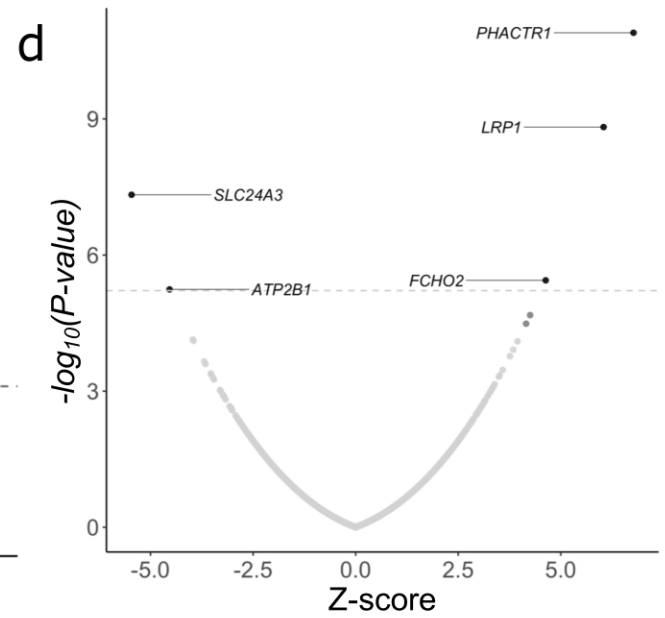

Figure S6

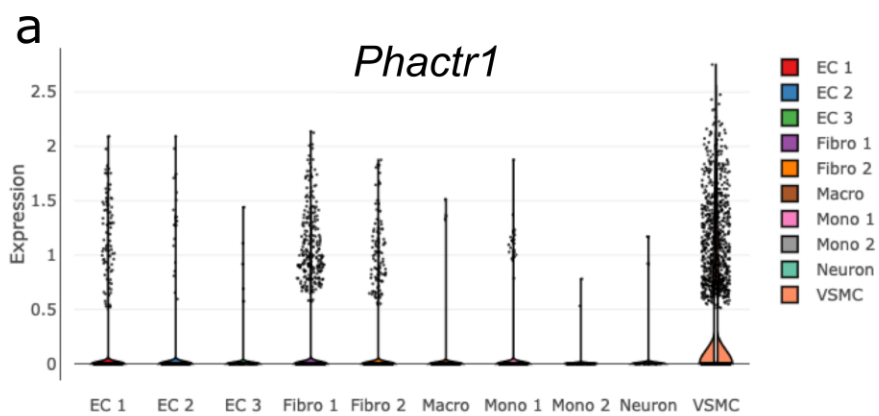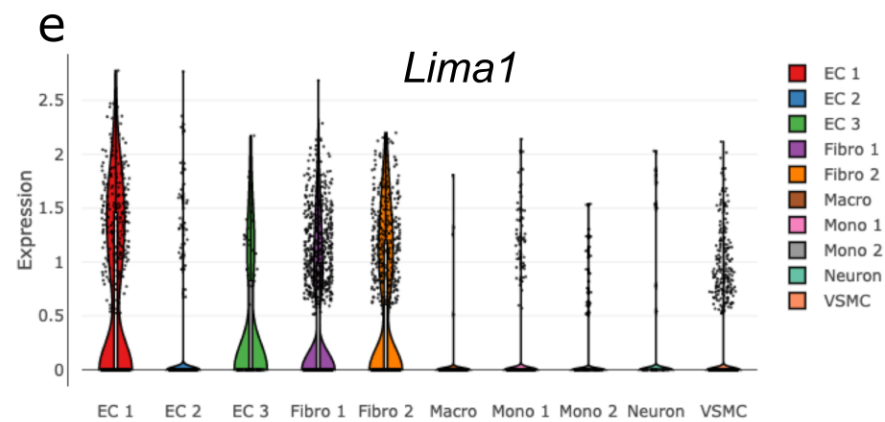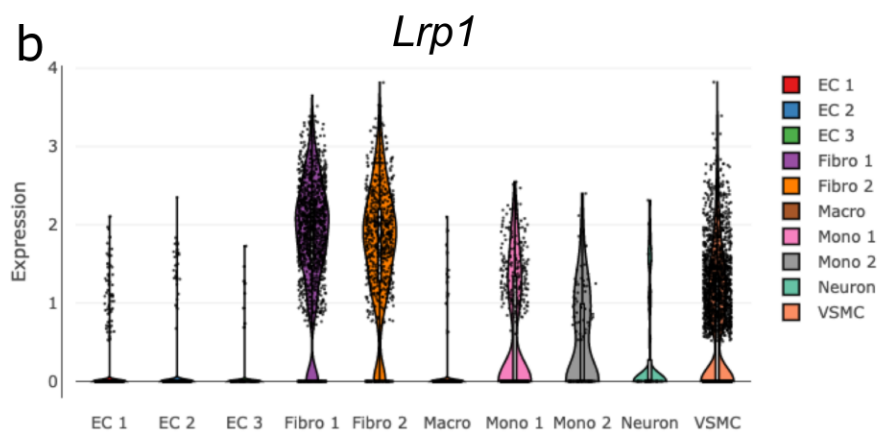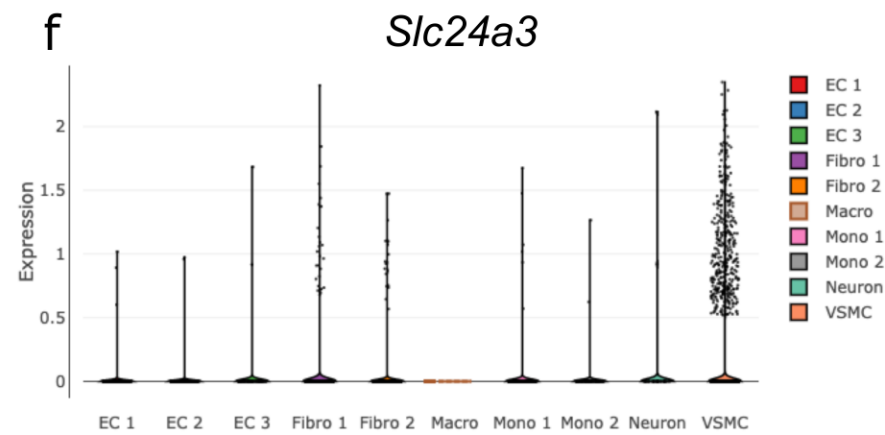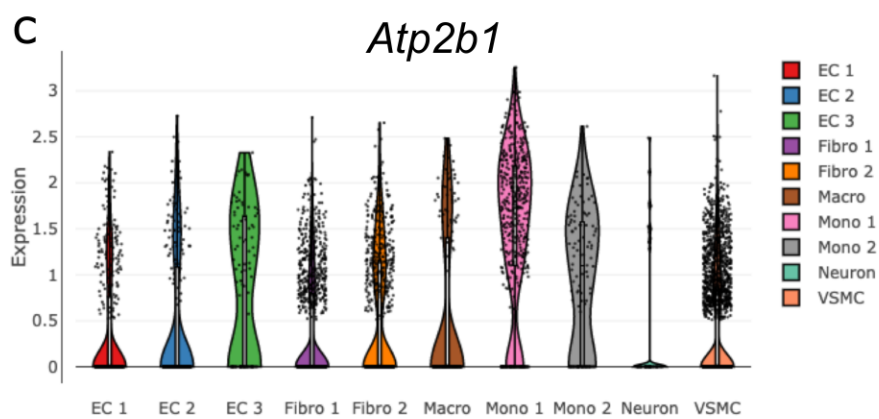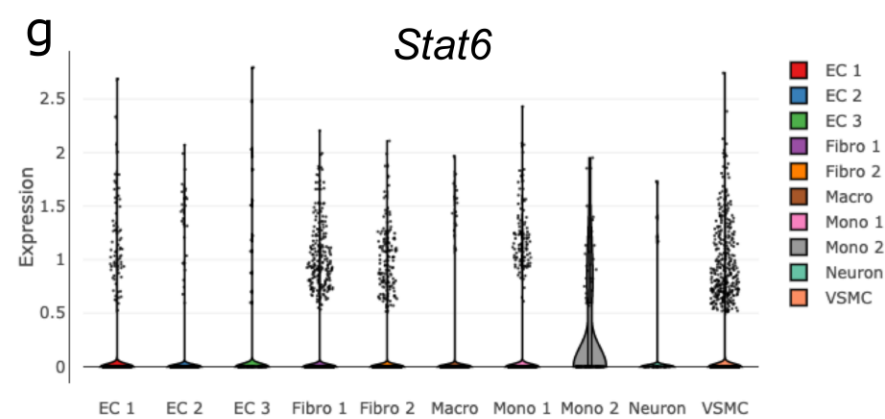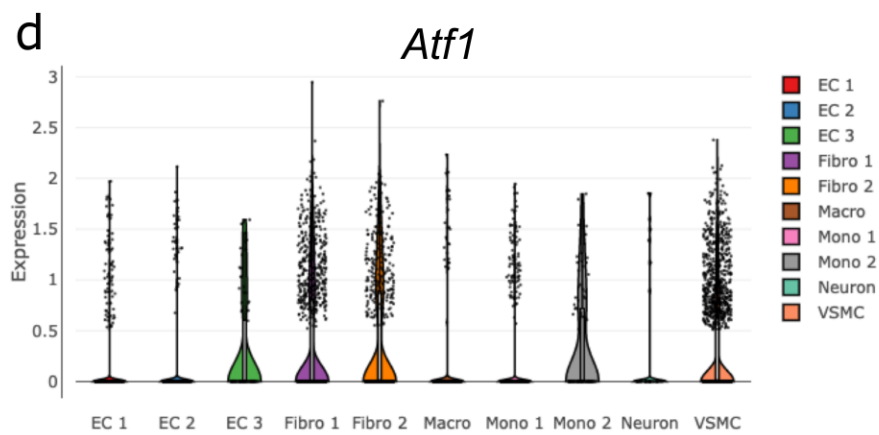

Figure S7

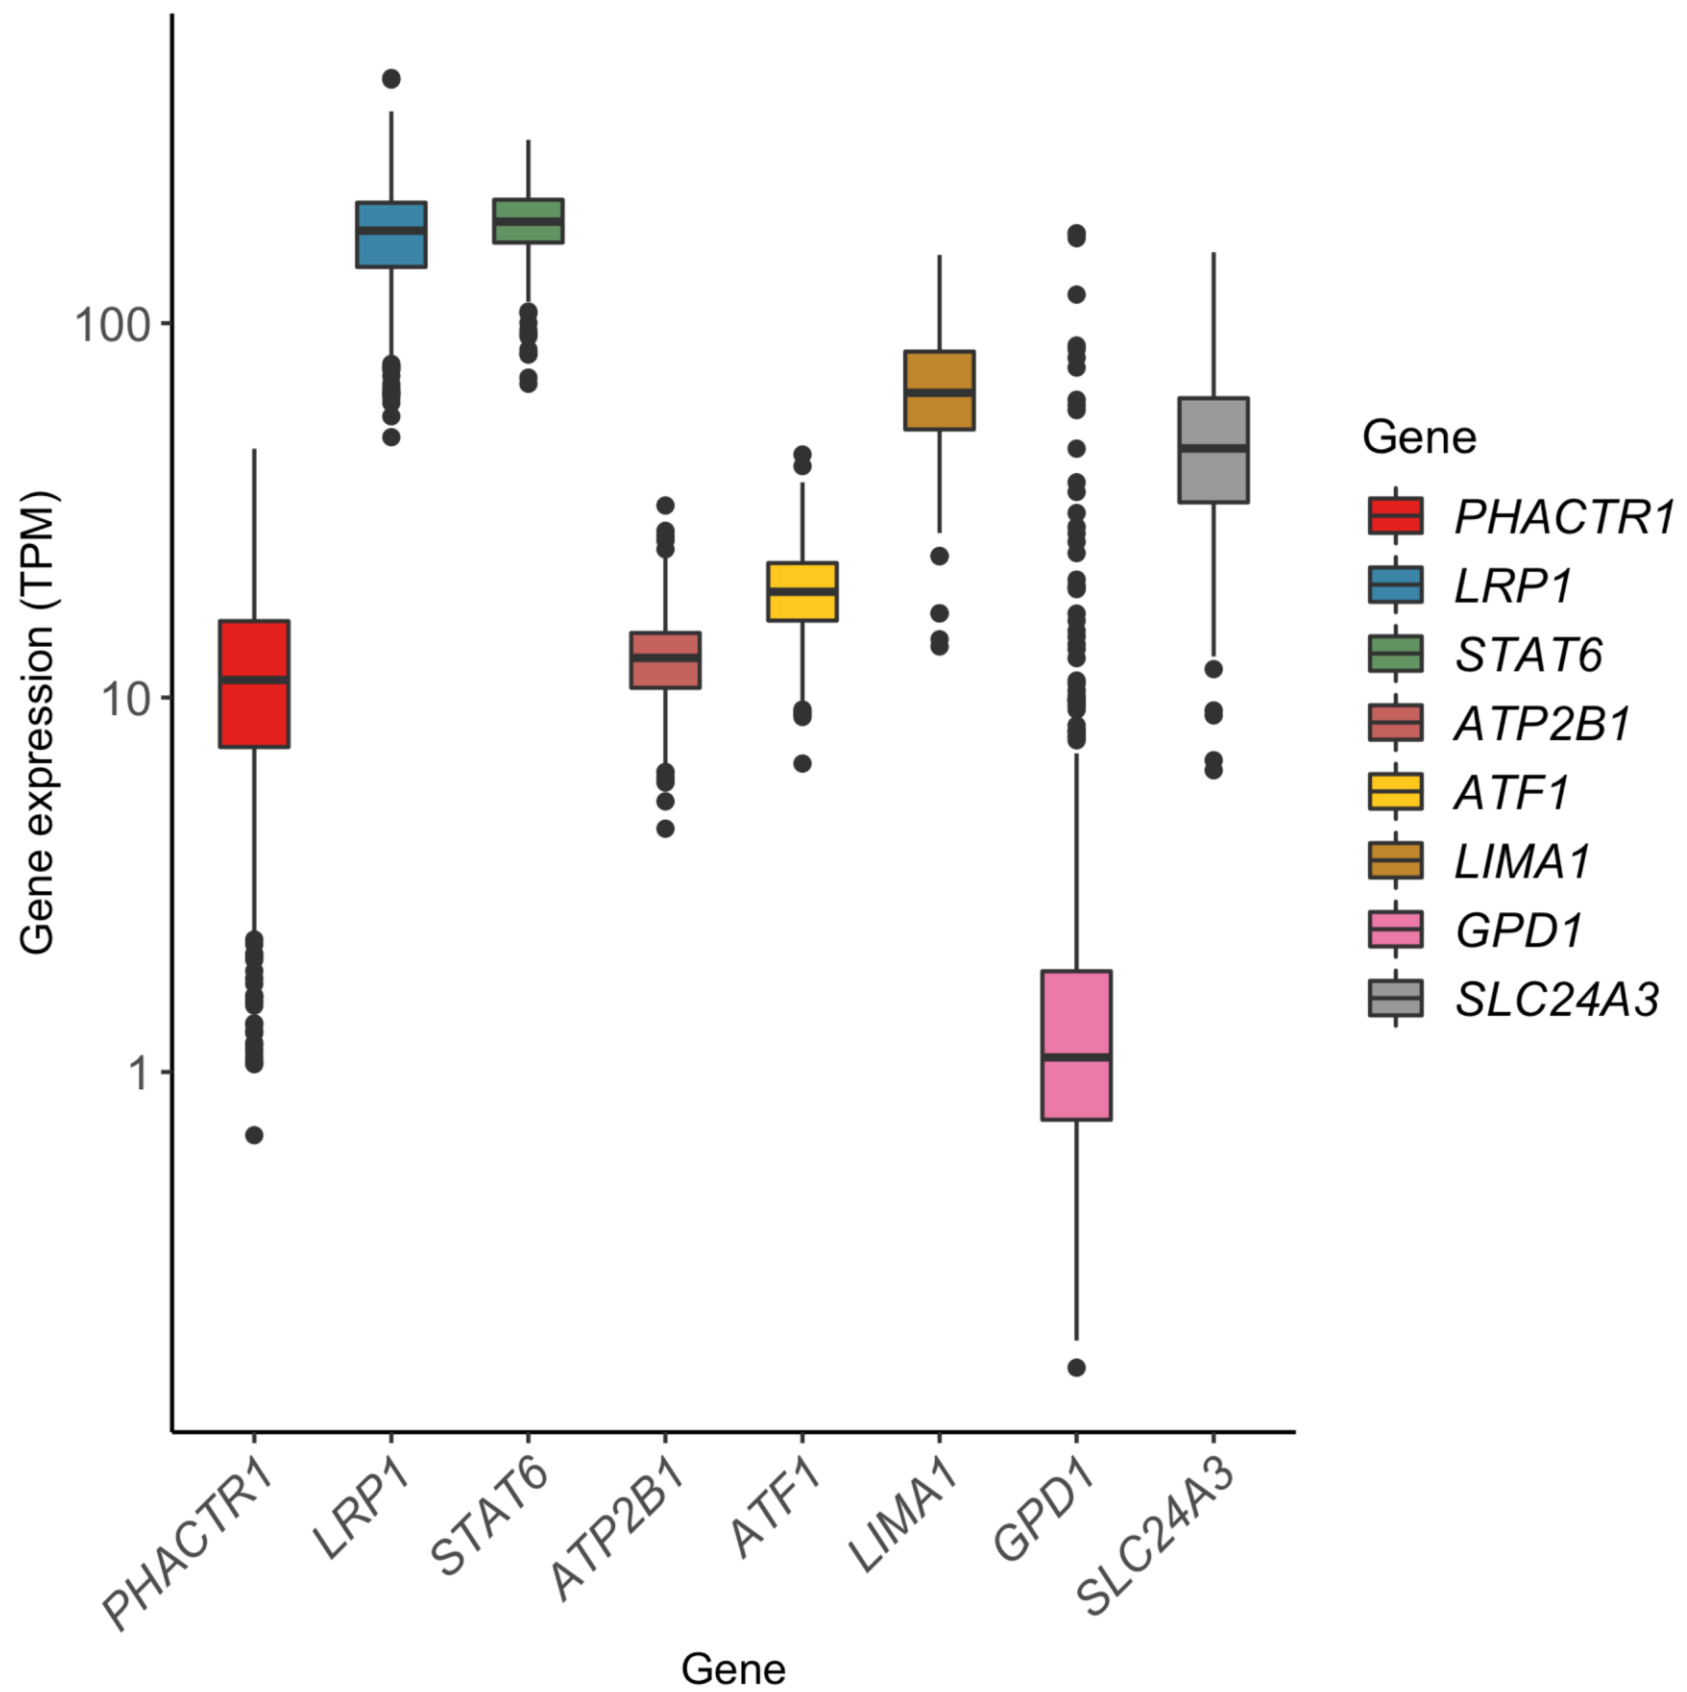

Figure S8

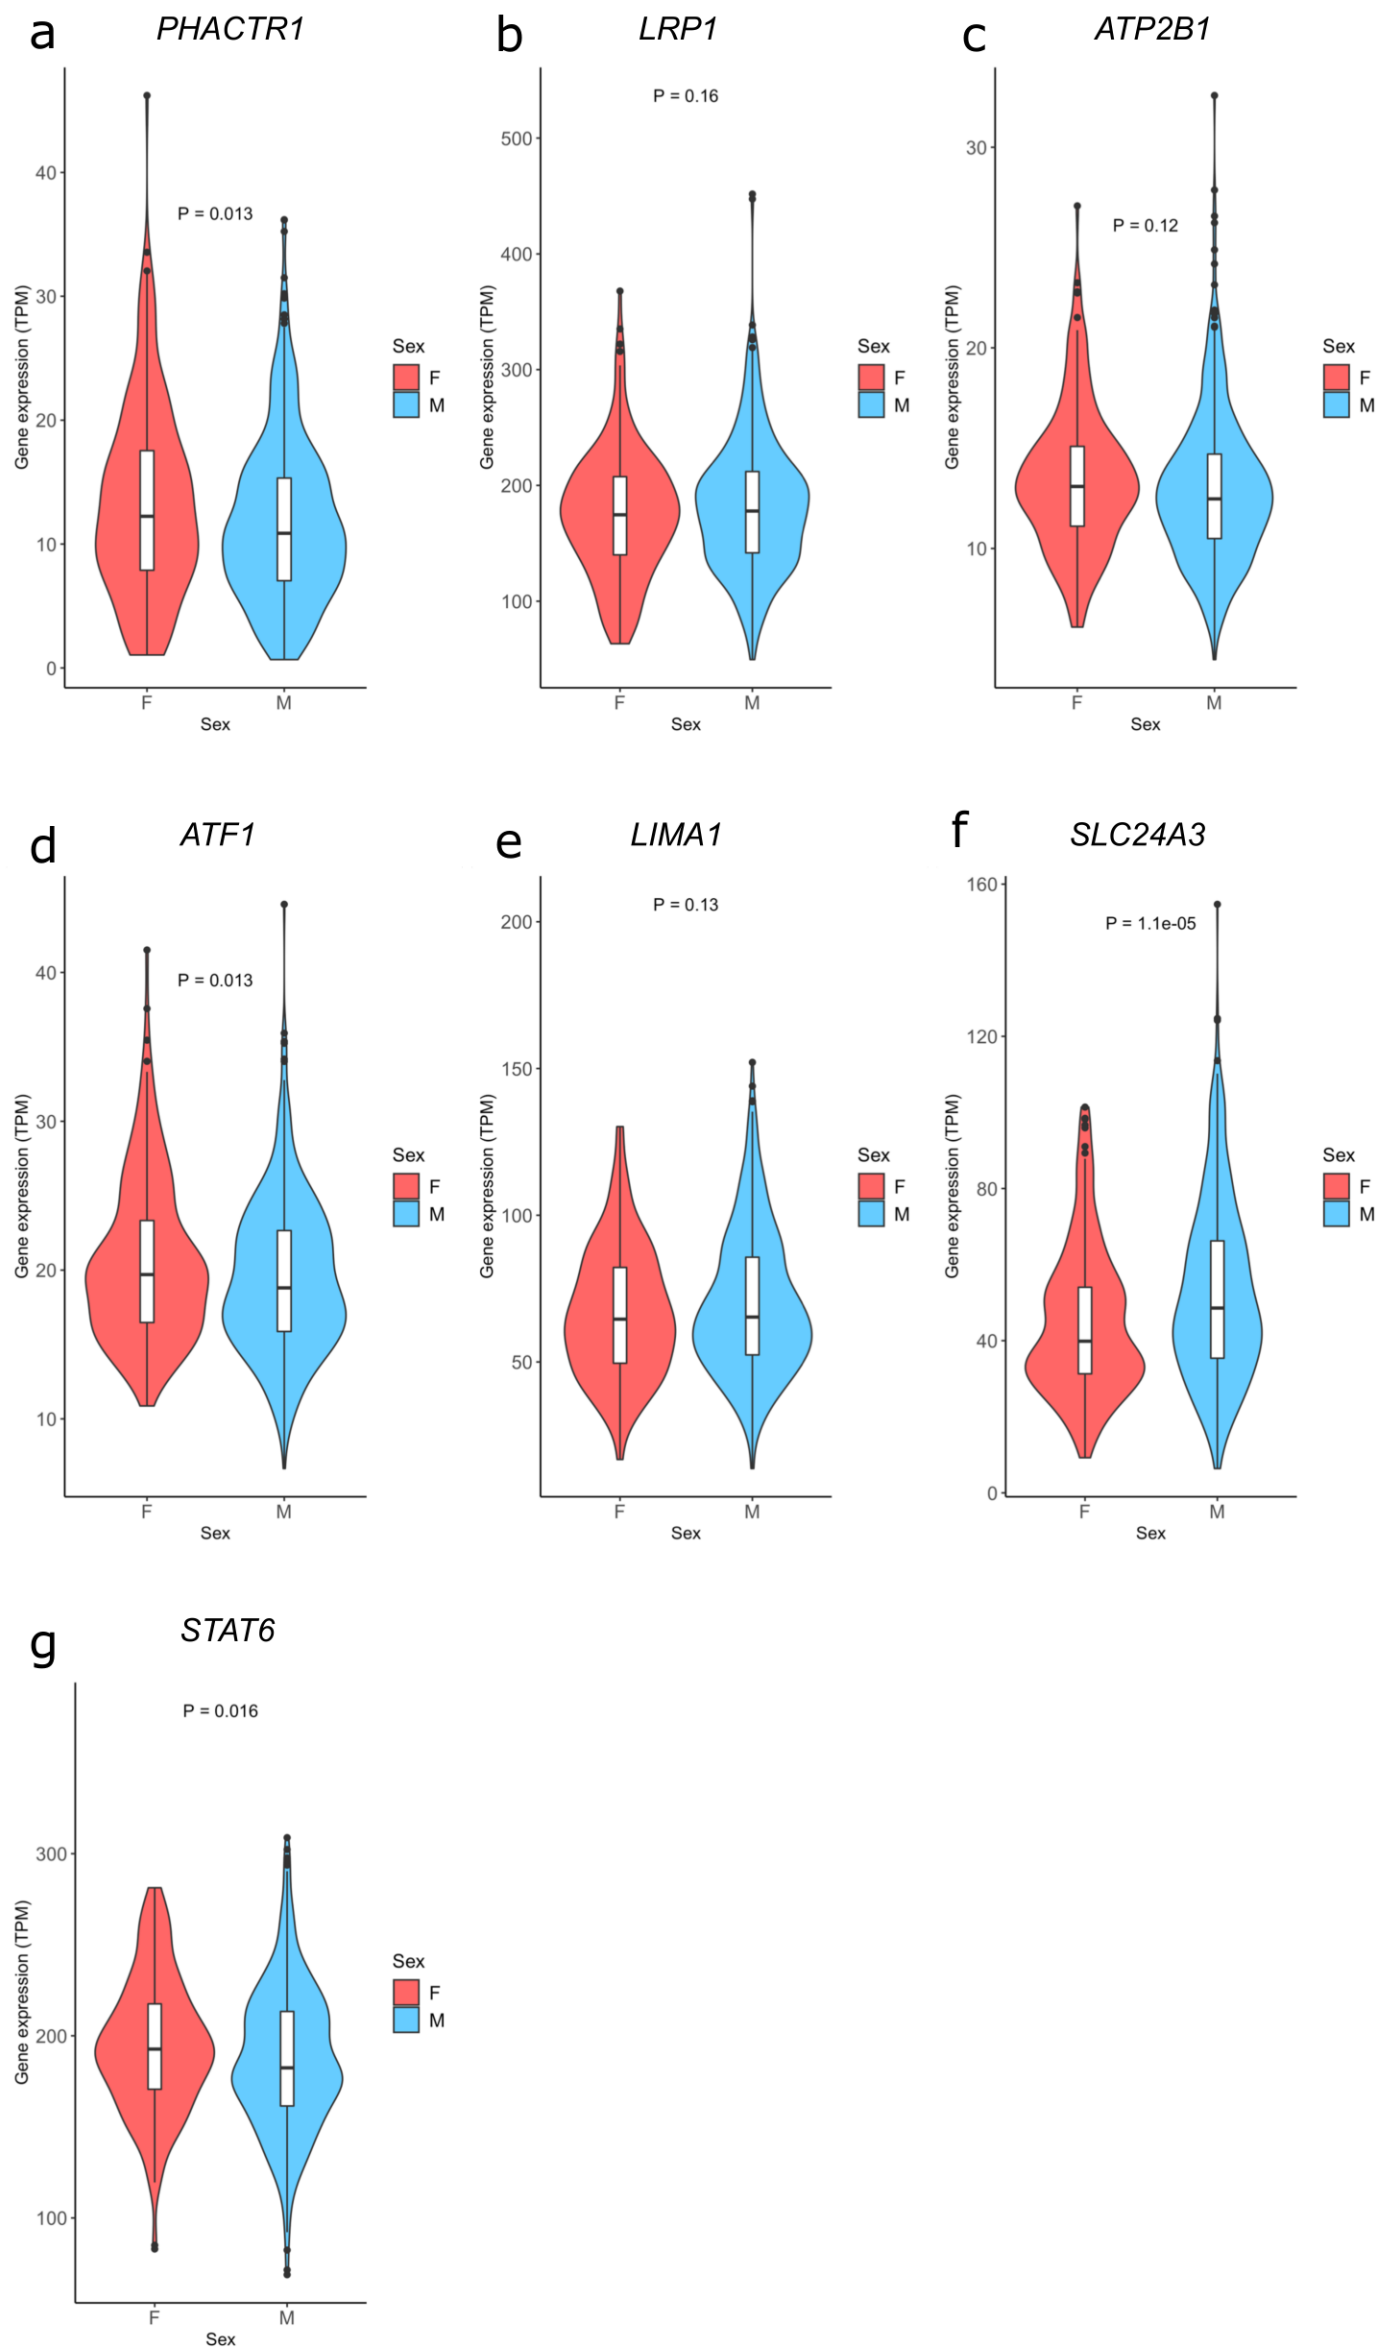



Figure S9

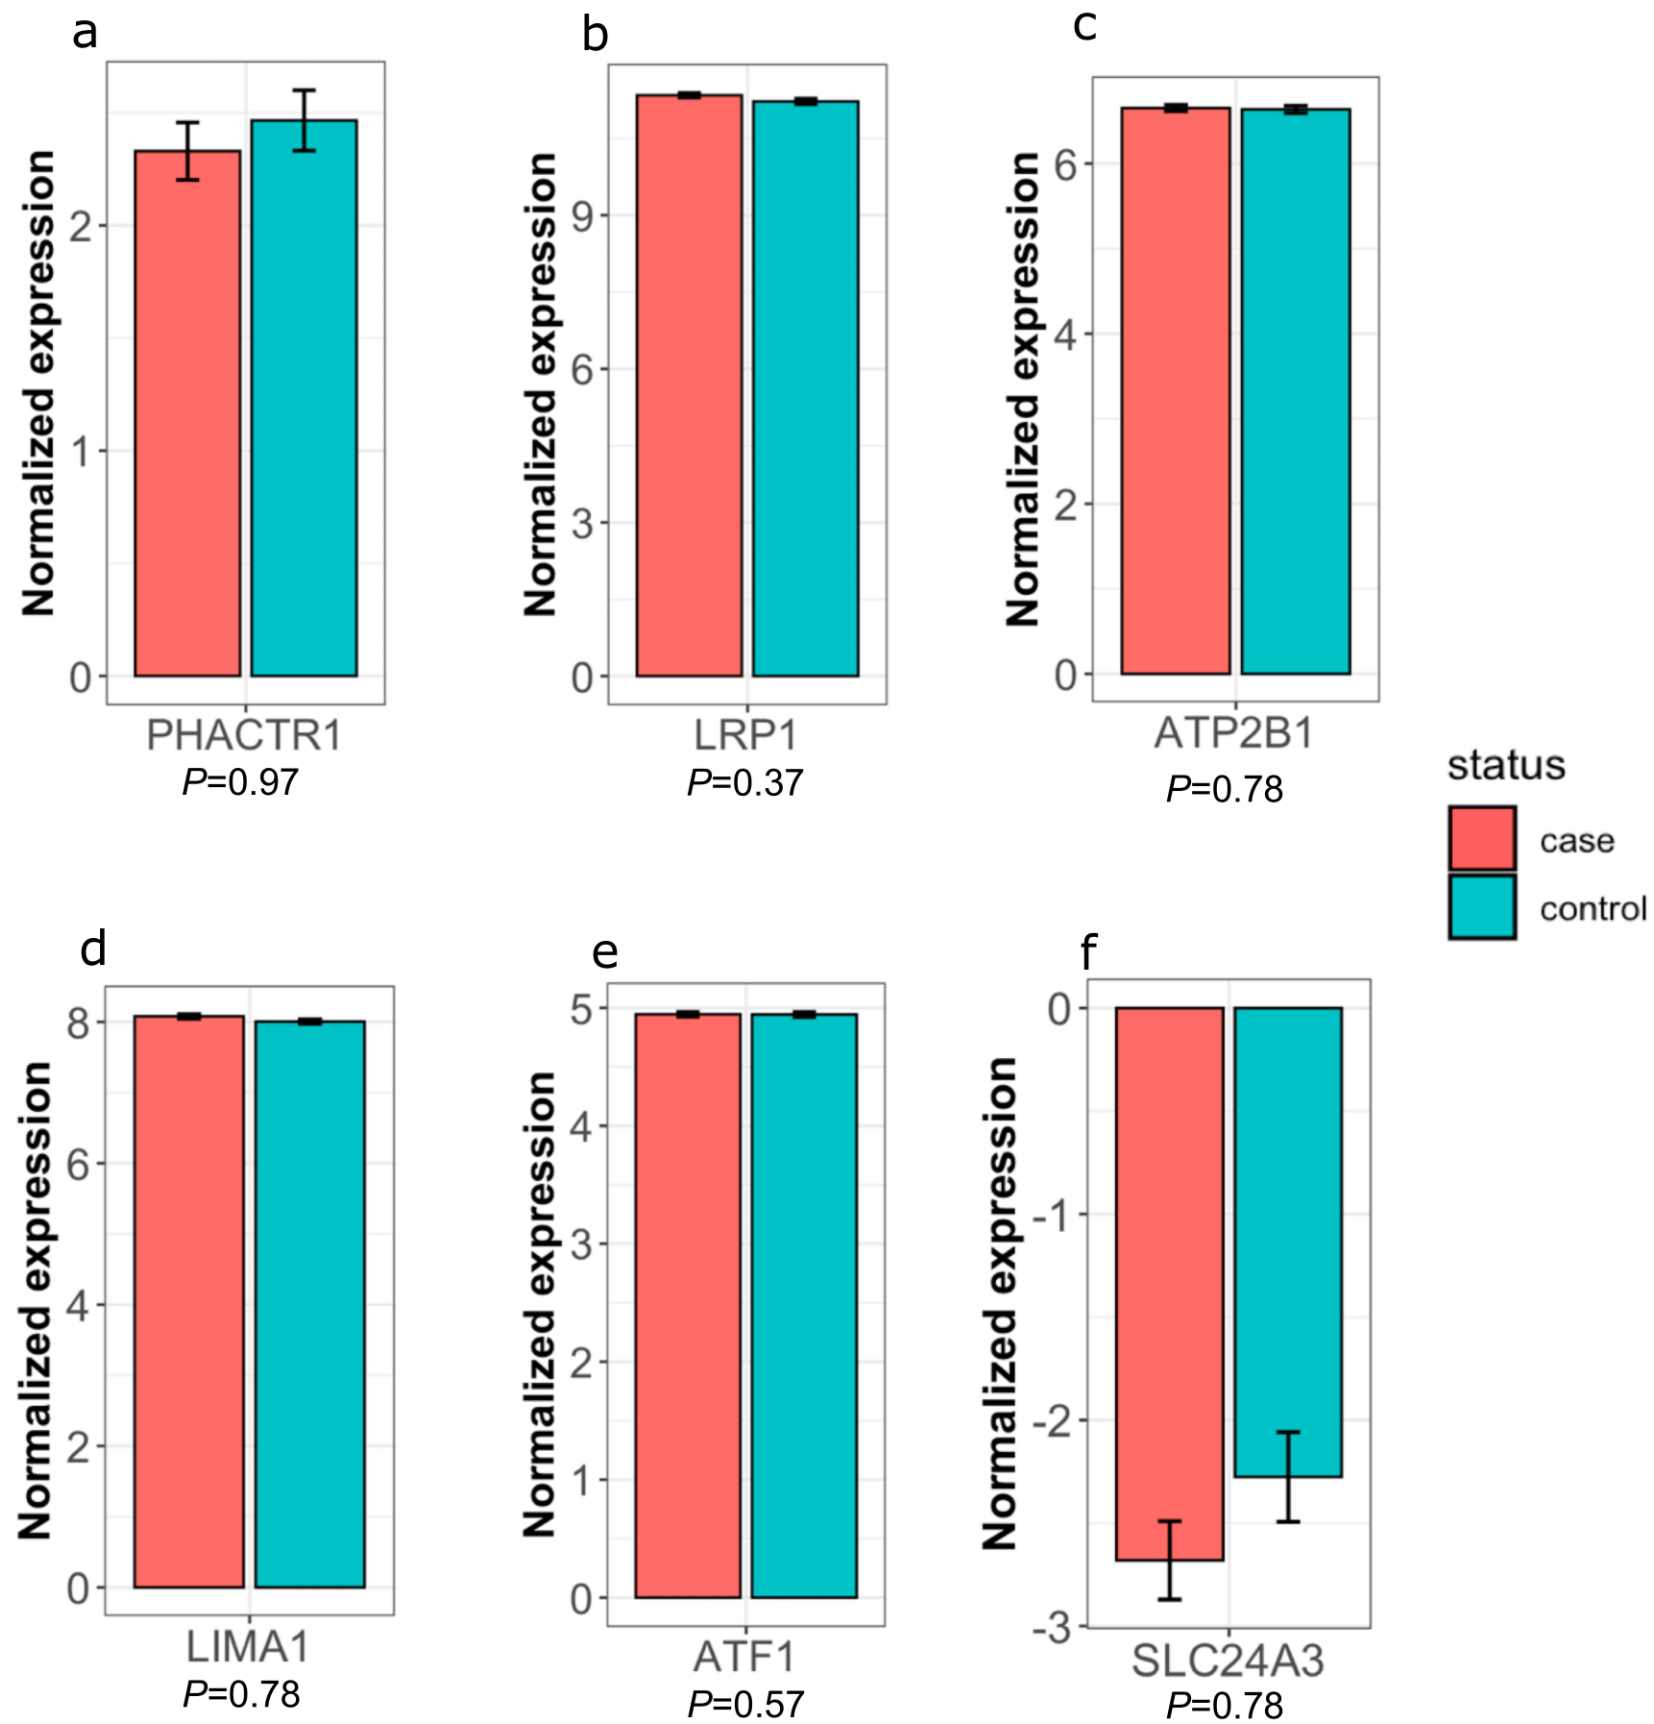

Figure S10

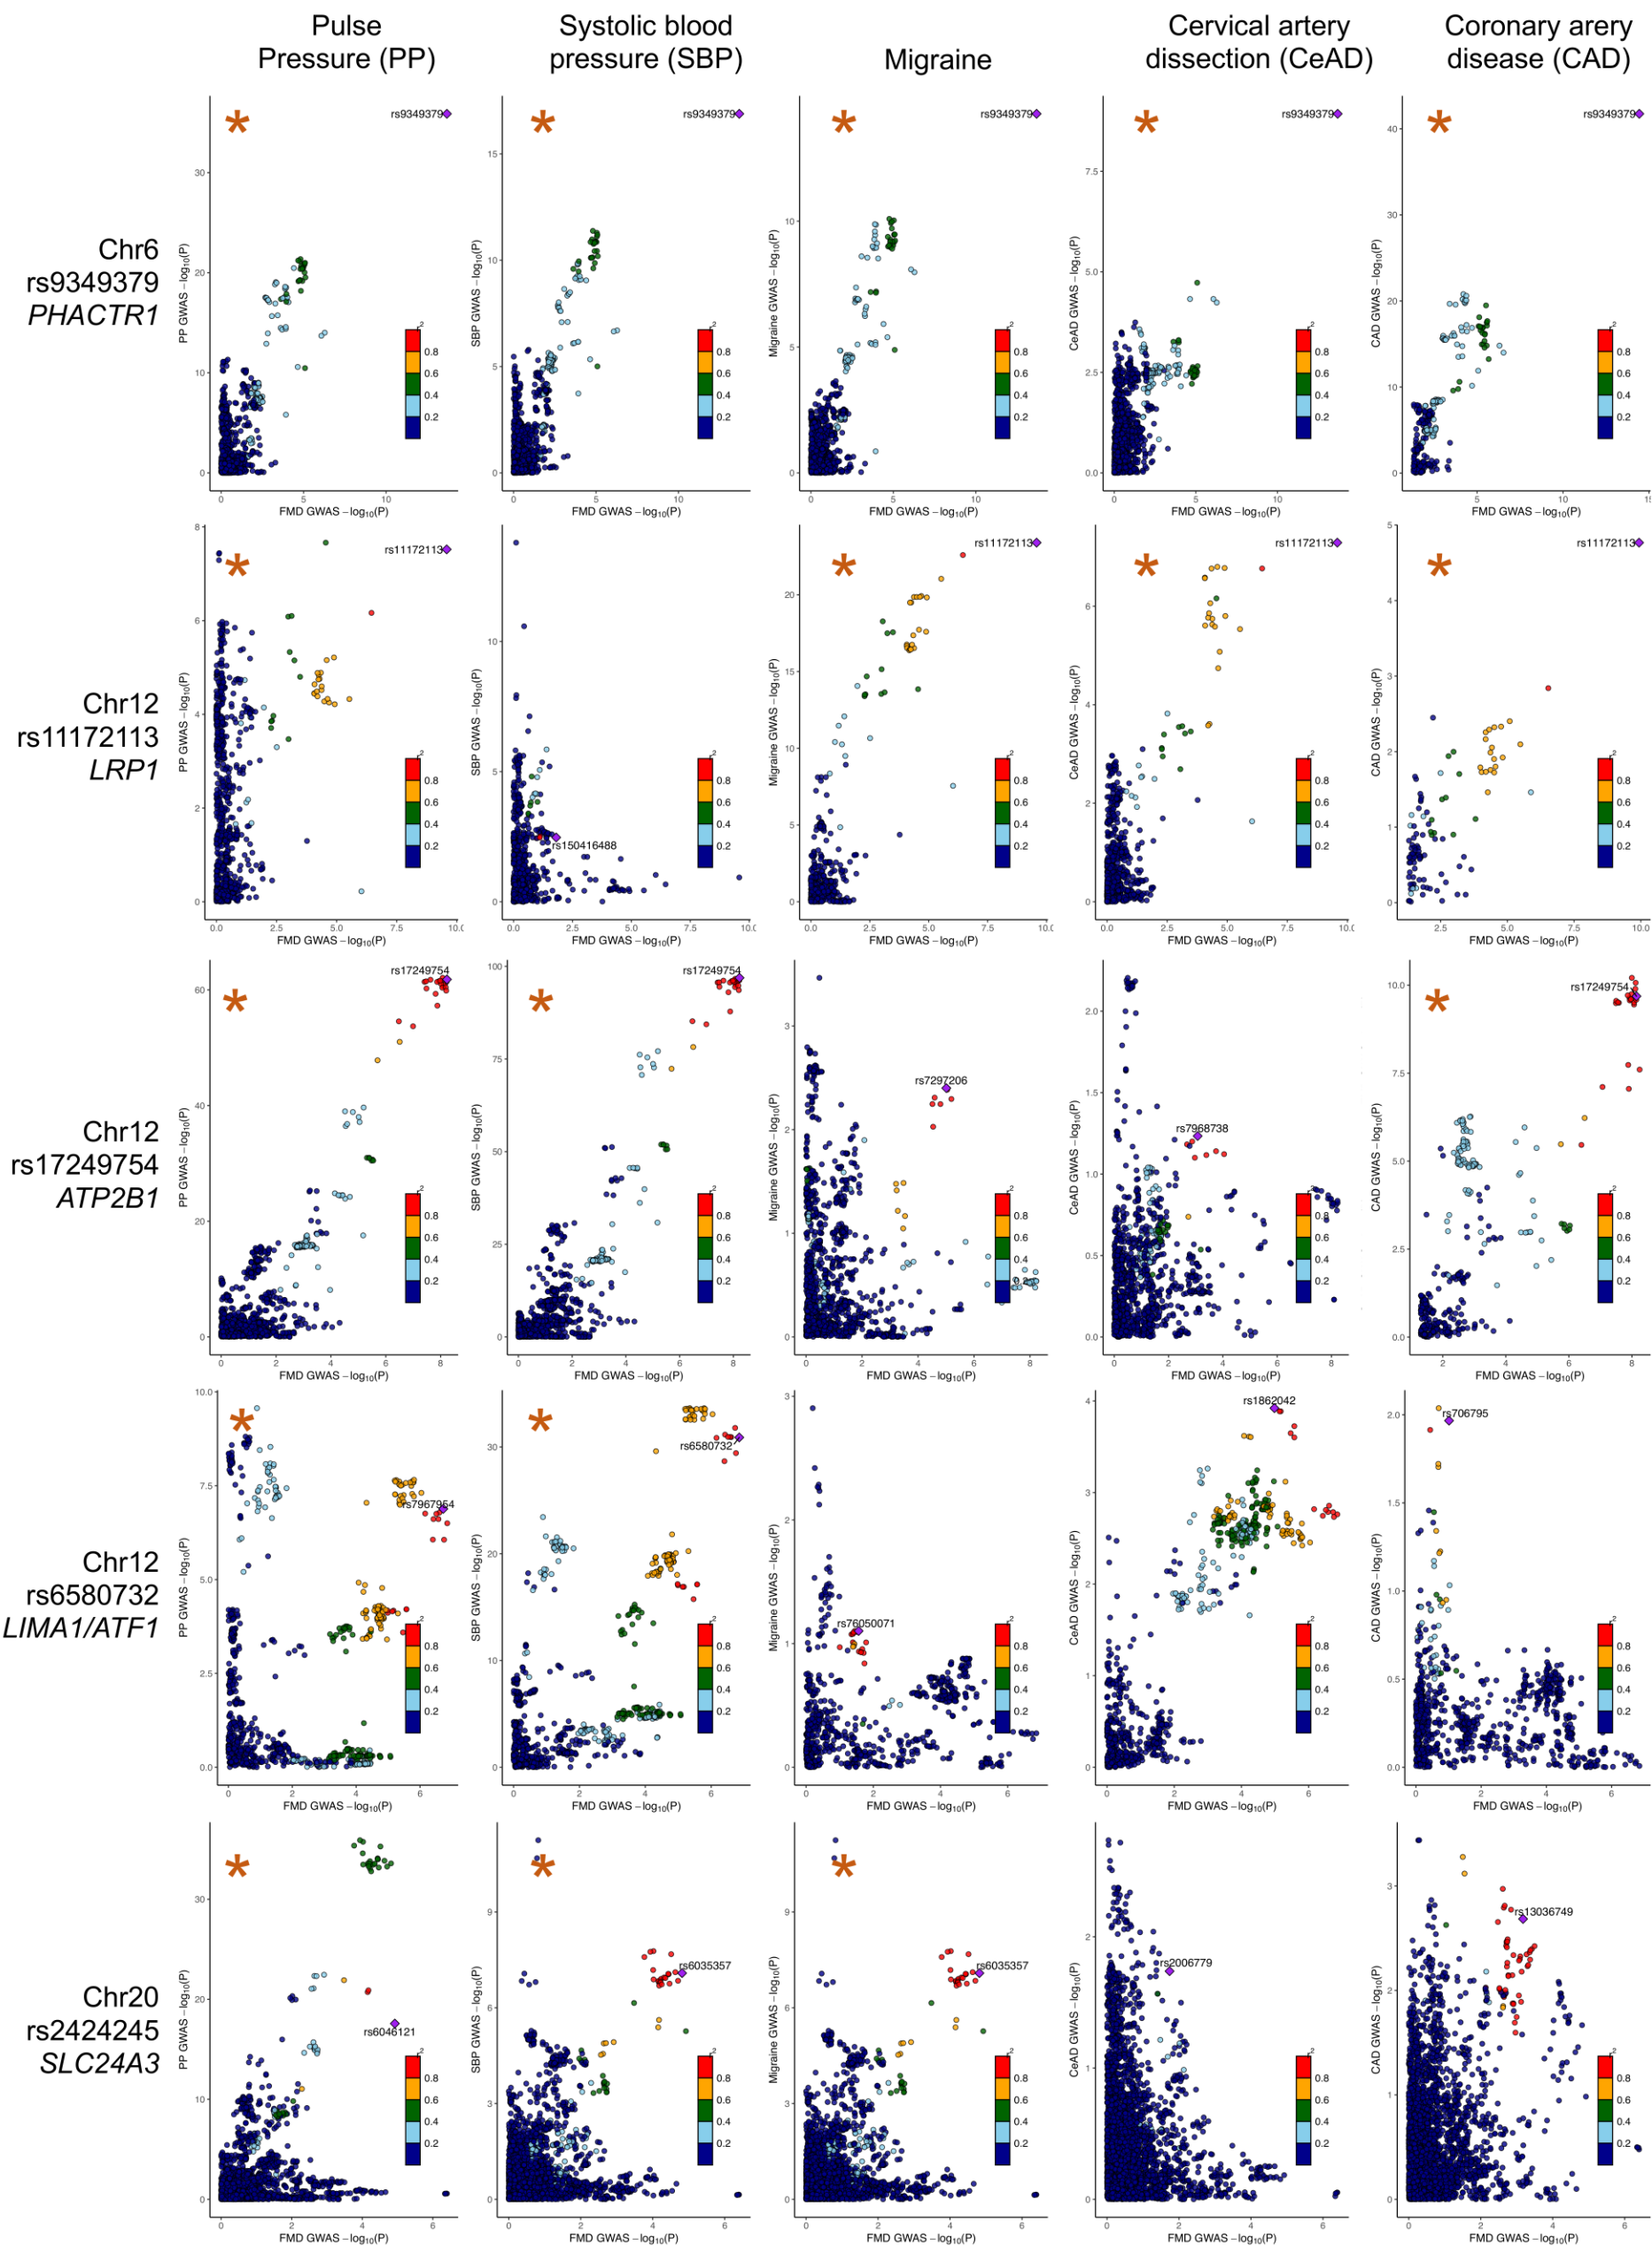

Supplement: Supplementary file [file 2020.09.16.20195701-2.pdf]
